# Supplementary material for: Small Cajal body-specific RNA12 Promotes Carcinogenesis through Modulating Extracellular Matrix Signaling in Bladder Cancer
Source: Preprints.org preprint supplement (doi:10.20944/preprints202312.0452.v1), 2023-12-07
Supplement: Supplementary file 1 [file supplementary]

**动物实验伦理审查表**  
The Tab of Animal Experimental Ethical Inspection

编号(No): 202008001

|                                                                                                                                                                                                              |                                                                                                                                                                                                                                                                                          |                                                                                |                                         |
|--------------------------------------------------------------------------------------------------------------------------------------------------------------------------------------------------------------|------------------------------------------------------------------------------------------------------------------------------------------------------------------------------------------------------------------------------------------------------------------------------------------|--------------------------------------------------------------------------------|-----------------------------------------|
| 申请人填写的相关信息<br>(Concerned information written by applicant)                                                                                                                                                   | 申请人(Applicant): Qinchen Lu                                                                                                                                                                                                                                                               |                                                                                |                                         |
|                                                                                                                                                                                                              | 申请人学历<br>(Education of applicant): Master                                                                                                                                                                                                                                                |                                                                                | 技术职称<br>(Professional title): /         |
|                                                                                                                                                                                                              | 实验名称(Study title): Subcutaneous tumor xenograft experiment                                                                                                                                                                                                                               |                                                                                |                                         |
|                                                                                                                                                                                                              | 实验目的(Aim of experiment): To establish subcutaneous tumor xenograft models in nude mice.                                                                                                                                                                                                  |                                                                                |                                         |
|                                                                                                                                                                                                              | 基金来源 (Fund sources): Guangxi Natural Science Fund for Innovation Research Team (2016GXNSFGA380006), Guangxi science and technology development project (AD17195090, AB18126055), National Natural Science Foundation of China (31471271, 31560311)                                       |                                                                                |                                         |
|                                                                                                                                                                                                              | 拟进动物情况                                                                                                                                                                                                                                                                                   | 动物来源(Source of animal): Laboratory Animal Center of Guangxi Medical University |                                         |
|                                                                                                                                                                                                              |                                                                                                                                                                                                                                                                                          | 品种品系(Species or strain): Male nude mice    等级(Grade): SPF                      |                                         |
|                                                                                                                                                                                                              |                                                                                                                                                                                                                                                                                          | 规格(Specifications): 5 weeks of age                                             |                                         |
|                                                                                                                                                                                                              |                                                                                                                                                                                                                                                                                          | 数量(Number): 24 只(♀ 24 只; ♂ 只)                                                  | 申请日期(Application date): 2020 年 8 月 20 日 |
|                                                                                                                                                                                                              |                                                                                                                                                                                                                                                                                          | 进驻日期(Entering date): 2020 年 8 月 22 日                                           | 结束日期(Ending date): 2020 年 9 月 20 日      |
| 1. 实验要点, 实验方法、观测指标<br>Outline of experiments: Mice were free to access water and were fed on a standard chow diet.<br>experimental methods: subcutaneous injection;<br>observational index: tumor formation. |                                                                                                                                                                                                                                                                                          |                                                                                |                                         |
| 2. 仁慈终点或实验终点:<br>Human endpoint or experimental terminative indicator: 3-4 weeks.                                                                                                                            |                                                                                                                                                                                                                                                                                          |                                                                                |                                         |
| 3. 实验结束后处死动物的方法:<br>Executing animal method: sacrificed by cervical dislocation.                                                                                                                             |                                                                                                                                                                                                                                                                                          |                                                                                |                                         |
| 4. 动物替代、减少动物用量、降低动物痛苦伤害的主要措施等:<br>Major measure for 3Rs: Reduce the number of animals used in experiments.                                                                                                   |                                                                                                                                                                                                                                                                                          |                                                                                |                                         |
| 申请人签名(Signature of applicant): 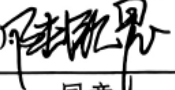 联系电话(Telephone): 18801586160                                                              |                                                                                                                                                                                                                                                                                          |                                                                                |                                         |
| 审查结果<br>(是否同意)                                                                                                                                                                                               | 课题负责人意见 (Study director):  同意 <input checked="" type="checkbox"/> 不同意 <input type="checkbox"/> 签 名 (Signature):  |                                                                                |                                         |

|                                                                                                           |                                                                                                                                                                                                                                                                                                                                                        |
|-----------------------------------------------------------------------------------------------------------|--------------------------------------------------------------------------------------------------------------------------------------------------------------------------------------------------------------------------------------------------------------------------------------------------------------------------------------------------------|
| 申请人的<br>实验方案)<br>(Results of<br>inspection)                                                               | 实验动物设施意见(Opinion from laboratory animal facility):<br><br>同意(Agree) <input checked="" type="checkbox"/> 不同意(Disagree) <input type="checkbox"/><br><br><br><br><br><br><br><div style="text-align: right;">           签 名 <br/>           (Signature)         </div> |
|                                                                                                           | 实验动物福利与伦理委员会意见(The Animal Care & Welfare Committee):<br><br>同意(Agree) <input checked="" type="checkbox"/> 不同意(Disagree) <input type="checkbox"/><br><br><br><br><div style="text-align: right;"> <br/>           (Stamp)         </div>                            |
| 备注(Supplement):<br>初审 <input type="checkbox"/> 第    次审查<br>First trial                      reexamine No. |                                                                                                                                                                                                                                                                                                                                                        |

填表须知：动物伦理审查遵循中华人民共和国科技部发布的《关于善待实验动物的指导性意见》及中华人民共和国国家标准 GB/T35892-2018《实验动物 福利伦理审查指南》，如有不明确之处请参看这两份文件或咨询广西医科大学实验动物福利与伦理委员会。

Notes: Animal ethics review follows the *Guiding Opinions on the Treatment of Laboratory Animals* issued by the Ministry of Science and Technology of the People's Republic of China and the *Laboratory Animal-Guideline for Ethical Review of Animal Welfare* issued by the National Standard GB/T35892-2018 of the People's Republic of China. If there are any uncertainties, please refer to these two documents or consult The Animal Care & Welfare Committee of Guangxi Medical University.
