# Supplementary material for: Small Cajal body-specific RNA12 Promotes Carcinogenesis through Modulating Extracellular Matrix Signaling in Bladder Cancer
Source: Preprints.org preprint supplement (doi:10.20944/preprints202312.0452.v1), 2023-12-07
Supplement: Supplementary file 2 [file supplementary]

Table S1 The clinical characteristics of 52 BLCA patients.

| Characteristics      | Number of patients |
|----------------------|--------------------|
| Gender               |                    |
| Male                 | 44                 |
| Female               | 8                  |
| Age                  |                    |
| <55                  | 11                 |
| ≥55                  | 39                 |
| TNM stage            |                    |
| I, II                | 34                 |
| III,IV               | 16                 |
| Smoking              |                    |
| Yes                  | 24                 |
| No                   | 26                 |
| Grade                |                    |
| High                 | 41                 |
| Low                  | 7                  |
| Lymphatic metastasis |                    |
| Yes                  | 13                 |
| No                   | 29                 |

Table S2: ISH scores of SCARNA12 in clinical tissue samples.

| Tissue type      | Cases | SCARNA12 expression level |            | P value |
|------------------|-------|---------------------------|------------|---------|
|                  |       | High level                | Low level  |         |
| Tumour tissues   | 140   | 118 (84.3%)               | 22 (15.7%) | <0.001  |
| Adjacent tissues | 51    | 11 (21.6%)                | 40 (78.4%) |         |

Table S3. The panel of antibodies used for CyTOF

| Antibodies                   | Clone    | Source    | Product_ID | Label |
|------------------------------|----------|-----------|------------|-------|
| ALDH                         | 44       | Fluidigm  | 3147015B   | 147Sm |
| Androgen Receptor            | G122-434 | Fluidigm  | 3154018B   | 154Sm |
| c-Myc                        | 9E10     | Fluidigm  | 3176012B   | 176Yb |
| CK6                          | EPR4515  | Abcam     | ab222395   | 146Nd |
| CK5                          | CK5      | Abcam     | ab53121    | 164Dy |
| Estrogen Receptor - $\alpha$ | C-542    | Abcam     | ab66102    | 142Nd |
| Estrogen Receptor- $\beta$   | 14C8     | Abcam     | ab288      | 174Yb |
| Ki67                         | Ki67     | BioLegend | 350523     | 161Dy |
| KLF4                         | D1F2     | Fluidigm  | 3162022A   | 162Dy |
| LGR5                         | SA222C5  | BioLegend | 373802     | 155Gd |
| MET                          | D1C2     | Fluidigm  | 3167017A   | 167Er |
| MUC1                         | SM3      | Abcam     | ab22711    | 168Er |
| Nanog                        | N31-355  | Fluidigm  | 3169014A   | 169Tm |
| Notch2                       | MHN2-25  | Fluidigm  | 3165026B   | 165Ho |
| OV6                          | OV-6     | R&D       | MAB2020    | 152Sm |
| p21                          | 12D1     | Fluidigm  | 3159026A   | 159Tb |
| p53                          | 7F5      | Fluidigm  | 3143018A   | 143Nd |
| Sox2                         | O30-678  | Fluidigm  | 3150019B   | 150Nd |
| Vimentin                     | RV202    | Fluidigm  | 3156023A   | 156Gd |
| CD45                         | HI30     | BioLegend | 304045     | Y89   |
| CD13                         | WM15     | Fluidigm  | 3160014B   | 160Gd |
| CD24                         | ML5      | Fluidigm  | 3166007B   | 166Er |
| CD34                         | 581      | Fluidigm  | 3149013B   | 149Sm |
| CD44                         | IM7      | Fluidigm  | 3171003B   | 171Yb |
| CD47                         | CC2C6    | Fluidigm  | 3209004B   | 209Bi |
| CD54                         | HA58     | Fluidigm  | 3170014B   | 170Er |
| CD90                         | 5E10     | BioLegend | 328102     | 158Gd |
| CD104                        | 58XB4    | Fluidigm  | 3173008B   | 173Yb |
| CD133                        | 170411   | R&D       | MAB11331   | 153Eu |
| CD166                        | 3A6      | BioLegend | 343902     | 145Nd |
| CD274 (PD-L1)                | 29E.2A3  | Fluidigm  | 3175017B   | 175Lu |
| CD326 (EpCAM)                | 9C4      | Fluidigm  | 3141006B   | 141Pr |
| CD333 (FGFR3)                | 136334   | R&D       | MAB766     | 151Eu |

Table S4. Detection of SCARNA12 interacting protein using Chromatin Isolation by RNA Purification (ChIRP)

| Accession | Score | Mass  | Matches   | Sequences | emPAI | Protein description                                                                 |
|-----------|-------|-------|-----------|-----------|-------|-------------------------------------------------------------------------------------|
| P02760    | 10909 | 39886 | 257 (218) | 2 (2)     | 0.49  | Protein AMBP OS=Homo sapiens OX=9606 GN=AMBP PE=1 SV=1                              |
| P41222    | 4167  | 21243 | 151 (119) | 3 (3)     | 0.8   | Prostaglandin-H2 D-isomerase OS=Homo sapiens OX=9606 GN=PTGDS PE=1 SV=1             |
| P04264    | 710   | 66170 | 29 (22)   | 23 (19)   | 1.77  | Keratin, type II cytoskeletal 1 OS=Homo sapiens OX=9606 GN=KRT1 PE=1 SV=6           |
| P35908    | 337   | 65678 | 16 (10)   | 15 (10)   | 0.63  | Keratin, type II cytoskeletal 2 epidermal OS=Homo sapiens OX=9606 GN=KRT2 PE=1 SV=2 |
| P13647    | 145   | 62568 | 7 (5)     | 7 (5)     | 0.29  | Keratin, type II cytoskeletal 5 OS=Homo sapiens OX=9606 GN=KRT5 PE=1 SV=3           |
| P05787    | 144   | 53671 | 3 (3)     | 2 (2)     | 0.13  | Keratin, type II cytoskeletal 8 OS=Homo sapiens OX=9606 GN=KRT8 PE=1 SV=7           |
| P02538    | 96    | 60293 | 5 (3)     | 5 (3)     | 0.17  | Keratin, type II cytoskeletal 6A OS=Homo sapiens OX=9606 GN=KRT6A PE=1 SV=3         |
| P13645    | 673   | 59020 | 26 (24)   | 22 (21)   | 2.48  | Keratin, type I cytoskeletal 10 OS=Homo sapiens OX=9606 GN=KRT10 PE=1 SV=6          |
| P35527    | 251   | 62255 | 17 (11)   | 14 (10)   | 0.76  | Keratin, type I cytoskeletal 9 OS=Homo sapiens OX=9606 GN=KRT9 PE=1 SV=3            |
| P08779    | 155   | 51578 | 6 (6)     | 6 (6)     | 0.45  | Keratin, type I cytoskeletal 16 OS=Homo sapiens OX=9606 GN=KRT16 PE=1 SV=4          |
| P05783    | 61    | 48029 | 3 (2)     | 3 (2)     | 0.14  | Keratin, type I cytoskeletal 18 OS=Homo sapiens OX=9606 GN=KRT18 PE=1 SV=2          |

|                |     |        |         |        |      |                                                                                       |
|----------------|-----|--------|---------|--------|------|---------------------------------------------------------------------------------------|
| P02753         | 638 | 23337  | 35 (23) | 1 (1)  | 0.14 | Retinol-binding protein 4 OS=Homo sapiens OX=9606 GN=RBP4 PE=1 SV=3                   |
| P02768         | 186 | 71317  | 12 (6)  | 8 (3)  | 0.2  | Serum albumin OS=Homo sapiens OX=9606 GN=ALB PE=1 SV=2                                |
| P35579         | 160 | 227646 | 11 (4)  | 11 (4) | 0.06 | Myosin-9 OS=Homo sapiens OX=9606 GN=MYH9 PE=1 SV=4                                    |
| P01834         | 154 | 11929  | 5 (3)   | 2 (2)  | 1.14 | Immunoglobulin kappa constant OS=Homo sapiens OX=9606 GN=IGKC PE=1 SV=2               |
| P60709         | 126 | 42052  | 12 (7)  | 9 (6)  | 0.7  | Actin, cytoplasmic 1 OS=Homo sapiens OX=9606 GN=ACTB PE=1 SV=1                        |
| A0A0C4D<br>H25 | 122 | 12621  | 1 (1)   | 1 (1)  | 0.27 | Immunoglobulin kappa variable 3D-20 OS=Homo sapiens OX=9606 GN=IGKV3D-20 PE=3 SV=1    |
| P02671         | 87  | 95656  | 1 (1)   | 1 (1)  | 0.03 | Fibrinogen alpha chain OS=Homo sapiens OX=9606 GN=FGA PE=1 SV=2                       |
| Q8WVN6         | 82  | 27307  | 1 (1)   | 1 (1)  | 0.12 | Secreted and transmembrane protein 1 OS=Homo sapiens OX=9606 GN=SECTM1 PE=1 SV=2      |
| P0C0L4         | 74  | 194261 | 1 (1)   | 1 (1)  | 0.02 | Complement C4-A OS=Homo sapiens OX=9606 GN=C4A PE=1 SV=2                              |
| P68871         | 70  | 16102  | 2 (2)   | 2 (2)  | 0.47 | Hemoglobin subunit beta OS=Homo sapiens OX=9606 GN=HBB PE=1 SV=2                      |
| P62805         | 69  | 11360  | 3 (3)   | 2 (2)  | 1.22 | Histone H4 OS=Homo sapiens OX=9606 GN=HIST1H4A PE=1 SV=2                              |
| Q9BQE3         | 65  | 50548  | 1 (1)   | 1 (1)  | 0.07 | Tubulin alpha-1C chain OS=Homo sapiens OX=9606 GN=TUBA1C PE=1 SV=1                    |
| O00187         | 62  | 77193  | 1 (1)   | 1 (1)  | 0.04 | Mannan-binding lectin serine protease 2 OS=Homo sapiens OX=9606 GN=MASP2 PE=1 SV=4    |
| O43390         | 46  | 71184  | 1 (1)   | 1 (1)  | 0.05 | Heterogeneous nuclear ribonucleoprotein R OS=Homo sapiens OX=9606 GN=HNRNPR PE=1 SV=1 |
| P69905         | 41  | 15305  | 1 (1)   | 1 (1)  | 0.22 | Hemoglobin subunit alpha OS=Homo sapiens OX=9606 GN=HBA1 PE=1 SV=2                    |
| P0C0S5         | 40  | 13545  | 1 (1)   | 1 (1)  | 0.25 | Histone H2A.Z OS=Homo sapiens OX=9606 GN=H2AFZ PE=1 SV=2                              |
| P19338         | 38  | 76625  | 2 (1)   | 2 (1)  | 0.04 | Nucleolin OS=Homo sapiens OX=9606 GN=NCL PE=1 SV=3                                    |
| Q8TF72         | 37  | 218321 | 1 (1)   | 1 (1)  | 0.01 | Protein Shroom3 OS=Homo sapiens OX=9606 GN=SHROOM3 PE=1 SV=2                          |

|        |    |         |        |        |      |                                                                                                        |
|--------|----|---------|--------|--------|------|--------------------------------------------------------------------------------------------------------|
| P16402 | 37 | 22336   | 15 (2) | 3 (2)  | 0.32 | Histone H1.3 OS=Homo sapiens OX=9606 GN=HIST1H1D PE=1 SV=2                                             |
| P07911 | 36 | 72451   | 1 (1)  | 1 (1)  | 0.05 | Uromodulin OS=Homo sapiens OX=9606 GN=UMOD PE=1 SV=1                                                   |
| P20929 | 31 | 775393  | 5 (1)  | 5 (1)  |      | Nebulin OS=Homo sapiens OX=9606 GN=NEB PE=1 SV=5                                                       |
| O15018 | 30 | 303964  | 3 (1)  | 3 (1)  | 0.01 | PDZ domain-containing protein 2 OS=Homo sapiens OX=9606 GN=PDZD2<br>PE=1 SV=4                          |
| Q6NXT2 | 28 | 15318   | 3 (1)  | 3 (1)  | 0.22 | Histone H3.3C OS=Homo sapiens OX=9606 GN=H3F3C PE=1 SV=3                                               |
| Q86Y46 | 27 | 59457   | 2 (1)  | 2 (1)  | 0.06 | Keratin, type II cytoskeletal 73 OS=Homo sapiens OX=9606 GN=KRT73 PE=1<br>SV=1                         |
| P62979 | 27 | 18296   | 3 (1)  | 3 (1)  | 0.18 | Ubiquitin-40S ribosomal protein S27a OS=Homo sapiens OX=9606<br>GN=RPS27A PE=1 SV=2                    |
| Q14BN4 | 25 | 95995   | 1 (1)  | 1 (1)  | 0.03 | Sarcolemmal membrane-associated protein OS=Homo sapiens OX=9606<br>GN=SLMAP PE=1 SV=1                  |
| Q5VTE0 | 25 | 50495   | 1 (1)  | 1 (1)  | 0.07 | Putative elongation factor 1-alpha-like 3 OS=Homo sapiens OX=9606<br>GN=EEF1A1P5 PE=5 SV=1             |
| Q8N448 | 23 | 77154   | 5 (1)  | 1 (1)  | 0.04 | Ligand of Numb protein X 2 OS=Homo sapiens OX=9606 GN=LNK2 PE=1<br>SV=1                                |
| Q8IX30 | 22 | 114399  | 2 (1)  | 2 (1)  | 0.03 | Signal peptide, CUB and EGF-like domain-containing protein 3 OS=Homo<br>sapiens OX=9606 GN=SCUBE3 PE=1 |
| Q8N3F8 | 21 | 94352   | 1 (1)  | 1 (1)  | 0.03 | MICAL-like protein 1 OS=Homo sapiens OX=9606 GN=MICAL1 PE=1 SV=2                                       |
| Q8WZ42 | 19 | 3842904 | 14 (1) | 13 (1) |      | Titin OS=Homo sapiens OX=9606 GN=TTN PE=1 SV=4                                                         |
| P98088 | 18 | 601963  | 2 (1)  | 2 (1)  | 0.01 | Mucin-5AC OS=Homo sapiens OX=9606 GN=MUC5AC PE=1 SV=4                                                  |
| P04198 | 16 | 49930   | 3 (1)  | 1 (1)  | 0.07 | N-myc proto-oncogene protein OS=Homo sapiens OX=9606 GN=MYCN PE=1<br>SV=2                              |
