# Supplementary material for: Small Cajal body-specific RNA12 Promotes Carcinogenesis through Modulating Extracellular Matrix Signaling in Bladder Cancer
Source: Preprints.org preprint supplement (doi:10.20944/preprints202312.0452.v1), 2023-12-07

**GUANGXI MEDICAL UNIVERSITY CANCER HOSPITAL  
ETHICAL REVIEW COMMITTEE  
Approval Notice**

**Approval Number:** LW2022008

**Title:** Small Cajal body-specific RNA 12 is a potential biomarker for the diagnosis and prognosis of bladder cancer

**Applicant:** Yuanliang Xie

**Application Department:** Department of urinary surgery, Guangxi Medical University Cancer Hospital

**Acknowledgement:** This study was supported by Guangxi Natural Science Foundation Program (2019GXNSFAA245097), Guangxi science and technology development project (AB18126055), National Natural Science Foundation of China (82060512, 82160501, 82060460, 82160501), Guangxi Clinical Research Center for Urology and Nephrology (No.2020AC03006)

**Date of Application:** 11 January 2022

**Date of Approval:** 12 January 2022

**Conclusion:** This project fully considered and protected the rights and interests of the study objects. It meets the criteria of Ethical Review Committee. The Medical Ethics Committee of Guangxi Medical University Cancer Hospital has approved the protocol.

**All methods were carried out in accordance with the Declaration of Helsinki.**

Guangxi Medical University Cancer Hospital  
Ethical Review Committee

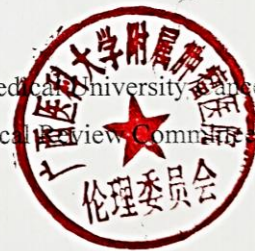

Supplement: Supplementary file 3 [file supplementary]
